# Supplementary material
Source: PubMed Central journal article supplement (PMC4873295)
Supplement: 10-1055-s-0042-104055-sup_gf1042.pdf [file 10-1055-s-0042-104055-sup_gf1042.pdf]

# Senologische Weiterbildung in der Gynäkologie: eine Bestandsaufnahme 2014

## Senology in Gynaecology Specialist Training: a Baseline Survey from 2014

### Autoren

J. Puppe<sup>1</sup>, M. Dieterich<sup>2</sup>, C. Bayer<sup>3</sup>, J. Neiman<sup>4</sup>, M. de Sousa Mendes<sup>5</sup>, P. Gaß<sup>3</sup>, J. Lermann<sup>3</sup>, S. Schott<sup>6</sup>

### Institute

Die Institutsangaben sind am Ende des Beitrags gelistet.

### Schlüsselwörter

- Weiterbildung Senologie
- Gynäkologie
- Junges Forum der DGGG
- Facharztweiterbildung

### Key words

- training in senology
- gynaecology
- DGGG Young Forum
- speciality training

### Zusammenfassung

**Einleitung:** Eine qualifizierte Weiterbildung in der Senologie ist für das Fortbestehen einer guten und qualitativ hochwertigen Patientenversorgung essenziell. Um den Ansprüchen der Weiterbildungsassistenten und der medizinischen Infrastruktur gerecht zu werden, ist es notwendig, die Weiterbildungsqualität regelmäßig zu erfassen, um diese entsprechend anpassen und optimieren zu können.

**Methodik:** Zur Erfassung der Weiterbildungsqualität haben wir einen 10 Items umfassenden Online-Fragebogen entwickelt. Die bundesweite Umfrage wurde an 4000 Assistenten und junge Fachärzte über den Newsletter der DGGG adressiert und war über 4 Wochen lang zugänglich.

**Ergebnisse:** An der Umfrage nahmen 111 Weiterbildungsassistenten aus der Gynäkologie und Geburtshilfe teil, davon 79% weiblich. 33% der Befragten arbeiteten an einer Universitätsklinik, 29% an einem Haus der Maximalversorgung ohne medizinische Fakultät, 37% an einem Krankenhaus der Grund- und Regelversorgung sowie 2% in einer Niederlassung. Eine zukünftige berufliche Betätigung im Bereich der Senologie konnten sich 25% der Befragten vorstellen. Die aktuell wahrgenommene allgemeine Weiterbildungsqualität wurde durchschnittlich als befriedigend bewertet. Die senologische Weiterbildung wurde von Weiterbildungsassistenten an Universitätskliniken im Vergleich zu Häusern der Maximal-, Grund- und Regelversorgung am besten bewertet (Note: 2,95). Eine Verbesserungsmöglichkeit der senologischen Weiterbildung wurde in einer festen Rotation in ein Brustzentrum mit umfassenden Fortbildungsmöglichkeiten gesehen.

**Zusammenfassung:** Es handelt sich um die erste Bestandsaufnahme zur senologischen Weiterbildung in Deutschland. Die Ergebnisse zeigen, dass es großen potenziellen Nachwuchs gibt. Des Weiteren existieren große Unterschiede in der emp-

### Abstract

**Introduction:** Qualified training in senology is essential for maintaining adequate, high quality patient care. In order to meet the needs of doctors in training and those of the medical infrastructure it is necessary to assess the quality of training regularly, to enable its adaption and optimisation.

**Methods:** We developed a comprehensive, 10 item online questionnaire to assess the quality of specialised training in senology. This questionnaire was sent to 4000 speciality trainees and young specialists countrywide via the DGGG newsletter and was accessible for over four weeks.

**Results:** 111 obstetrics and gynaecology speciality trainees participated in this national survey, 79% of whom were female. 33% of participants were working at university hospitals, 29% at hospitals offering maximal level care without an associated medical faculty, 37% at hospitals offering primary and secondary level care and 2% at gynaecology practices. 25% of participants could imagine working in the field of senology in future. On average the current perception of general specialist training was satisfactory. Specialist trainees at university hospitals rated training in senology highest (score: 2.95) compared to those at other hospitals. A fixed rotation through a breast centre offering comprehensive advanced training was seen as a potential improvement to senology training.

**Conclusions:** This is the first survey of specialised training in senology to be conducted in Germany. Results showed that there is significant potential for young doctors to enter the speciality in future. There are also significant differences in the perceived quality of senology training between training facilities. This survey aimed to determine the quality of specialised training at senology centres and hopes to contribute to a sustainable improvement in training. The intention is to continue to

**eingereicht** 1.9.2015  
**revidiert** 26.1.2016  
**akzeptiert** 28.2.2016

### Bibliografie

**DOI** <http://dx.doi.org/10.1055/s-0042-104055>  
Geburtsh Frauenheilk 2016; 76:  
1–7 © Georg Thieme Verlag KG  
Stuttgart · New York ·  
ISSN 0016-5751

### Korrespondenzadresse

**Dr. med. Julian Puppe**  
Uniklinik Köln  
Klinik und Poliklinik für Frauen-  
heilkunde und Geburtshilfe  
Kerpener Straße 34  
50931 Köln  
[Julian.puppe@uk-koeln.de](mailto:Julian.puppe@uk-koeln.de)

fundenen Weiterbildungsqualität zwischen den Weiterbildungsstätten. Diese Umfrage soll dazu beitragen, die Weiterbildungsqualität an senologischen Zentren für Assistenten der Gynäkologie und Geburtshilfe zu erfassen und nachhaltig zu verbessern. Ziel ist es, die Senologie weiterhin für Gynäkologen attraktiv zu gestalten und eine solide Weiterbildung sicherzustellen.

## Genderhinweis

▼ Aus Gründen der leichteren Lesbarkeit wurde in der Regel die männliche Schreibweise verwendet bzw. auf die zusätzliche Formulierung der weiblichen Form verzichtet.

## Einleitung

▼ Die Senologie hat ihren festen Stellenwert in der gynäkologisch-onkologischen Versorgung in Deutschland [1]. Neben der Diagnostik, Therapie und Nachsorge der weiblichen Brust ist es eine interdisziplinäre Disziplin, welche die Gynäkologie, Radiologie, Pathologie sowie weitere Fachbereiche umfasst. Die Deutsche Gesellschaft für Senologie e.V. (DGS) wurde 1981 unter gynäkologischer Federführung zur Optimierung der interdisziplinären Behandlung von Brusterkrankungen ins Leben gerufen. Nach wie vor repräsentieren die Gynäkologen mit 47% die größte Fachgruppe dieser Gesellschaft [2].

Die senologische Weiterbildung wird in der Weiterbildungsordnung im Fach Gynäkologie und Geburtshilfe abgedeckt. Eine Schwerpunktbezeichnung oder Zusatzweiterbildung „Senologie“ gibt es durch die Bundesärztekammer nicht. Im Gegenteil: junge Ärzte erlangen eine zusätzliche Qualifikation durch Zusatzveranstaltungen wie z.B. die Kurse der Deutschen Akademie für Senologie oder erhalten hierüber ein erweitertes Basiswissen [3]. Erschwerend kommt hinzu, dass das gesamte Spektrum der Senologie mit der Möglichkeit der Weiterbildung, neben den zertifizierten Brustzentren, überwiegend nur an Häusern der Maximalversorgung angeboten wird [4]. Durch diese Spezialisierung hat die Mehrzahl der Weiterbildungsassistenten teilweise keinen Zugang zu einer umfangreichen senologischen Weiterbildung im Klinikalltag. Zwar bieten auch Weiterbildungspraxen die Möglichkeit, Teilspektren der Senologie zu erlernen, jedoch sind derartige Konzepte im Rahmen von Rotationsprogrammen nicht flächendeckend verfügbar. Ein spezifisches interdisziplinäres Curriculum wurde daher durch die Deutsche Akademie für Senologie 2014 ins Leben gerufen [3].

Um die hohen Qualitätsstandards der senologischen Versorgungsstrukturen auch zukünftig aufrechtzuerhalten, ist es unabdingbar, eine adäquate und praxisorientierte senologische Weiterbildung für junge Ärzte zu gewährleisten. Um die Weiterbildung stetig zu verbessern, ist es essenziell, die Erfahrung und Bewertung durch den Nachwuchs zu erfassen. Zur Weiterbildungsqualität in der Senologie existieren bis dato keine Erhebungen. Ziel der bundesweiten Befragung durch das Junge Forum der Deutschen Gesellschaft für Gynäkologie und Geburtshilfe e.V. (DGGG) war daher eine Bestandsaufnahme zur praktizierten Weiterbildung in der Senologie und deren Beurteilung durch die Weiterbildungsassistenten. Zusätzlich galt es, strukturierte Weiterbildungskonzepte in den Kliniken und Brustzentren ausfindig zu machen. Darüber hinaus soll diese Online-Umfrage dazu beitragen, neue Erkenntnisse über die Bedürfnisse und Ansprüche

make senology attractive to gynaecologists and to ensure well-grounded training.

der jungen Kollegen sowie Verbesserungsvorschläge bez. der Weiterbildungsinhalte zu gewinnen.

## Methodik

### Studienrekrutierung

Es wurde ein Online-Fragebogen mit 10 Items im Arbeitskreis des Jungen Forums der DGGG e.V. entwickelt und über den Newsletter des Jungen Forums der DGGG an über 4000 Assistenten in Weiterbildung und Schwerpunktweiterbildung versandt. Die Datenerhebung erfolgte im Juni 2014 über einen Zeitraum von 4 Wochen. Insgesamt nahmen 111 Personen an der Umfrage teil (Partizipationsrate: 2,8%). Die anonymisierte Auswertung erfolgte mit dem Softwaretool [www.surveymonkey.com](http://www.surveymonkey.com). Mehrfachteilnahmen waren durch eine anonyme IP-Adressenüberprüfung ausgeschlossen.

### Fragebogeninstrument

Der erste Teil evaluiert die Basisdaten (Geschlecht), demografische Angaben (Alter) sowie die berufliche Tätigkeit (Weiterbildungsjahr, Weiterbildungsstätte). Der weitere Fragebogen untersucht das Interesse zur senologischen Weiterbildung innerhalb der jungen Ärzte sowie die Weiterbildungsqualität in der Senologie. Dies ist aufgeteilt zwischen Haus der Grund- und Regelversorgung, Haus der Maximalversorgung und Universitätsklinikum. Zusätzlich werden für die jungen Kollegen wichtige Weiterbildungsinhalte und Weiterbildungsqualitätsmerkmale abgefragt. Falls nicht anders dargestellt, besteht eine Bewertungsmöglichkeit von 1 bis 6, wobei 1 als beste und 6 als schlechteste Wertung (sehr wichtig – überhaupt nicht wichtig) gilt. Es wird jeweils der Mittelwert angegeben und eine Wertung von 1 bis 3 als befürwortende Antwortkategorie gewertet.

### Statistik

Die statistische Auswertung der Ergebnisse erfolgte mit der Software Excel 2011 bei unverbundener und normal verteilter Stichprobe mittels t-Test (Signifikanzniveau:  $p < 0,05$ ).

## Ergebnisse

### Demografische Angaben, Berufserfahrungen der Befragten

Insgesamt nahmen 111 Personen an der 4-wöchigen Umfrage teil, davon waren 79,3% ( $n = 88$ ) weiblich. Das Durchschnittsalter der Studienpopulation lag bei 31,8 Jahren. Die Mehrzahl der Befragten (33%) befand sich im 5. Weiterbildungsjahr und sind zu 99% im Krankenhaus angestellt (● Abb. 1). Die medizinischen Versorgungszentren sowie Praxen waren mit 1% unterrepräsentiert, und wurden zur weiteren Auswertung nicht mit einbezogen.

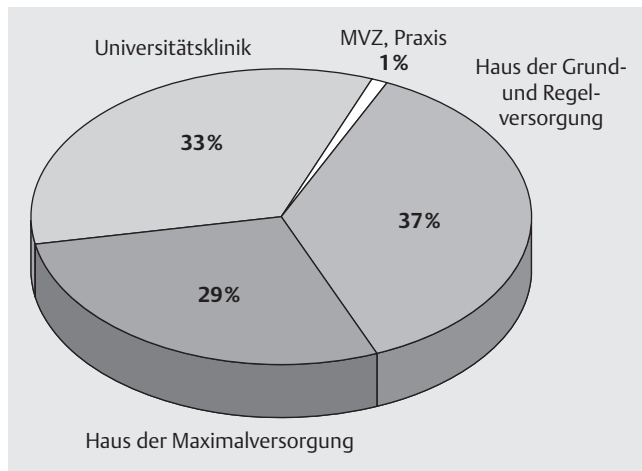

**Abb. 1** Art der Weiterbildungsstätte zum Zeitpunkt der Datenerhebung (n = 111).

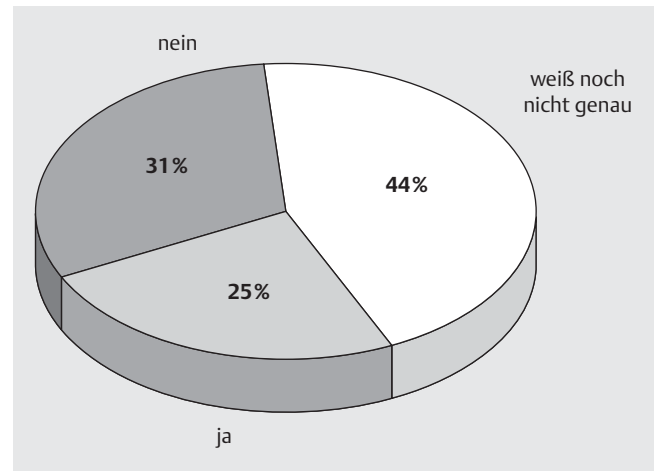

**Abb. 2** Streben Sie eine spätere Tätigkeit in der Senologie an?

### Berufsziel Senologie:

#### Es gibt großen potenziellen Nachwuchs

Eine zukünftige berufliche Betätigung im Bereich der Senologie konnten sich 25% der Befragten vorstellen, wohingegen 31% angaben, zukünftig nicht in diesem Bereich arbeiten zu wollen. 44% waren noch unentschieden (Abb. 2).

### Weiterbildungsqualität: große Variationen zwischen Unikliniken und kleineren Weiterbildungsstätten

Insgesamt wird die Weiterbildung in der Senologie durch die Befragten befriedigend bewertet (Note 3,34). Die größte Zufriedenheit mit der senologischen Weiterbildung wurde von Weiterbildungsassistenten an Universitätskliniken beobachtet, wobei im Vergleich die Häuser der Grund- und Regelversorgung sowie die Häuser der Maximalversorgung etwas schlechter abschnitten (Tab. 1).

**Tab. 1** Gesamtbeurteilung der Weiterbildungsqualität in der Senologie aufgeteilt nach Weiterbildungsstätte (Schulnoten). Vergleich Universitätsklinikum vs. Haus der Grund- und Regelversorgung ( $p = 0,064$ ) oder Haus der Maximalversorgung ( $p = 0,047$ ).

| Weiterbildungsstätte                | Note (Ø) |
|-------------------------------------|----------|
| Haus der Grund- und Regelversorgung | 3,44     |
| Haus der Maximalversorgung          | 3,62     |
| Universitätsklinikum                | 2,95     |
| insgesamt                           | 3,34     |

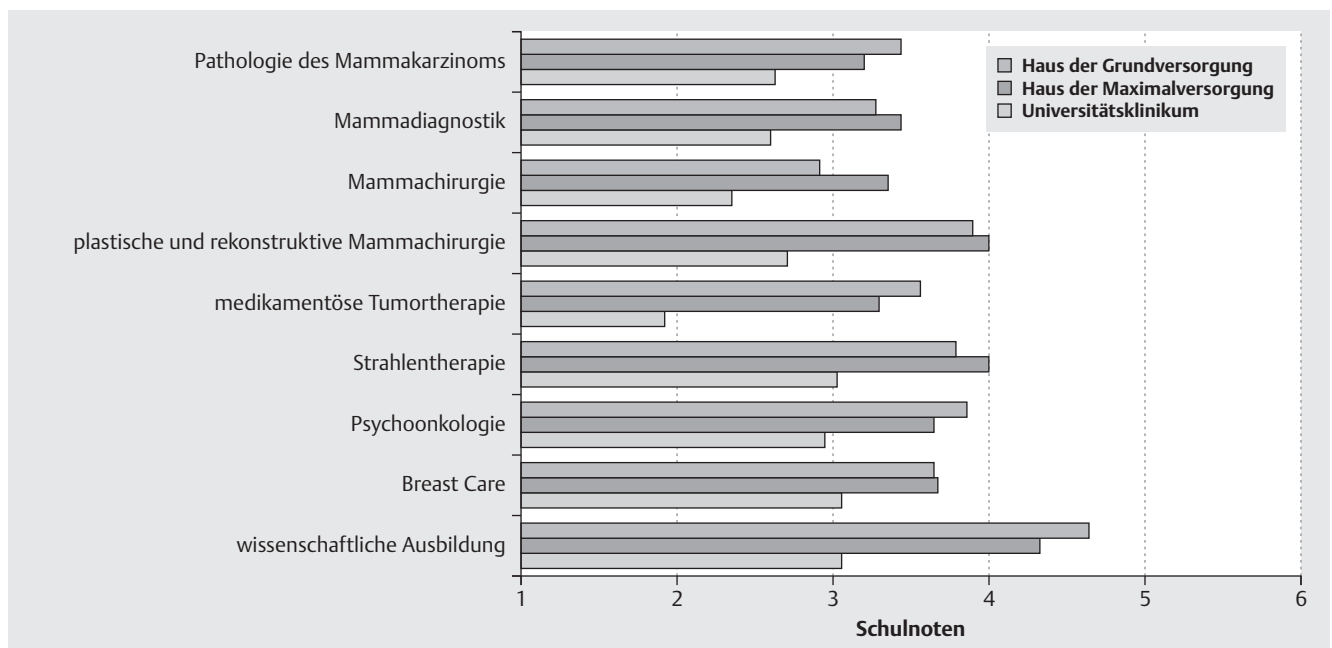

**Abb. 3** Wie beurteilen die Befragten die Weiterbildungsqualität folgender Bereiche an ihrer Weiterbildungsstätte? (Schulnoten).

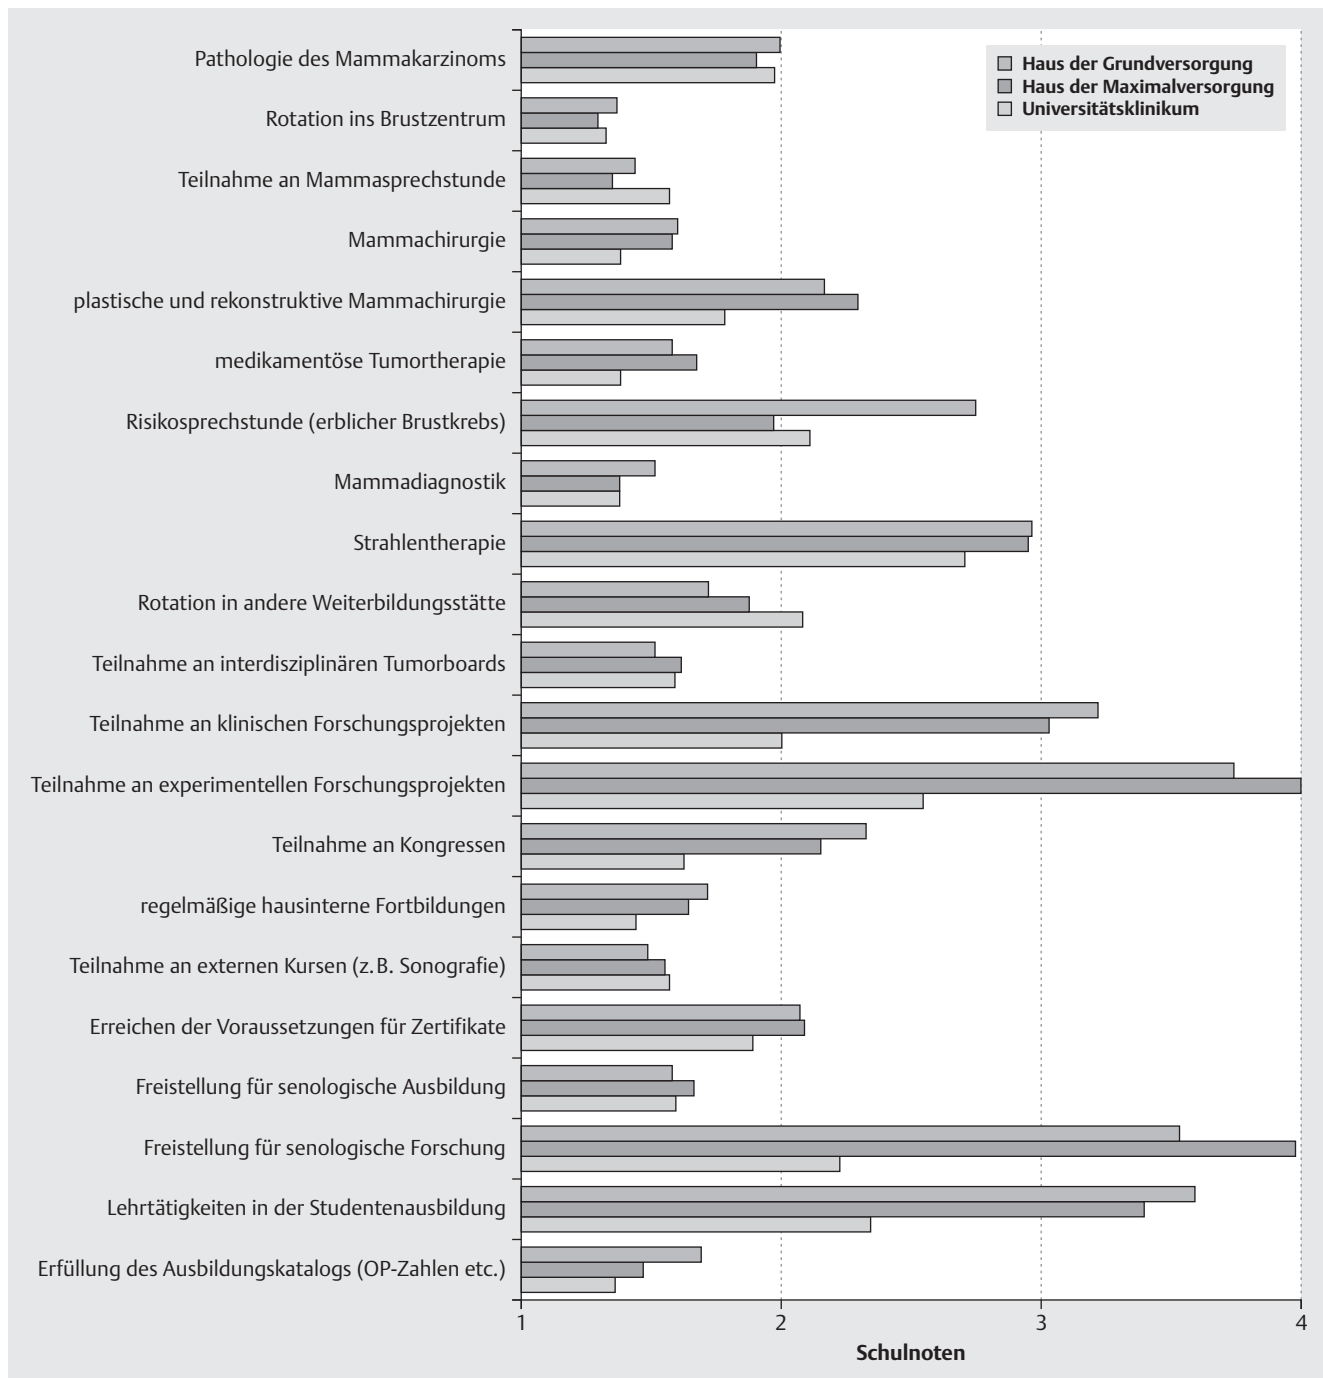

**Abb. 4** Wie wichtig sind Ihnen folgende Weiterbildungsinhalte? Bewertungsskala: 1 = sehr wichtig bis 6 = überhaupt nicht wichtig, keine Bewertung > 4 (Schulnoten).

Abb. 3 zeigt die Bewertungen der aktuellen Weiterbildungsqualität der verschiedenen senologischen Bereiche. Universitäre Zentren schnitten in allen adressierten Bereichen am besten ab. Generell wurde die mammachirurgische Ausbildung am besten vermittelt (Mittelwert aller Befragten: 2,88). Im Vergleich zu Universitätskliniken wurde an den anderen Weiterbildungsstätten die Weiterbildungskultur im Bereich der medikamentösen Tumorthherapie (Universitätsklinikum [1,92] vs. Haus der Grund- und Regelversorgung [3,56] oder Haus der Maximalversorgung [3,29]) und plastisch-rekonstruktiven Mammachirurgie (Universitätsklinikum [2,70] vs. Haus der Grund- und Regelversorgung

[3,91] oder Haus der Maximalversorgung [4,00]) besonders schlecht bewertet. Auch die Ausbildung des wissenschaftlichen Nachwuchses erfolgt an den Universitätskliniken am besten (Universitätsklinikum [3,05] vs. Haus der Grund- und Regelversorgung [4,65] oder Haus der Maximalversorgung [4,32]). Diese Unterschiede waren jeweils signifikant ( $p < 0,001$ ). An allen Weiterbildungsstätten bemängelten die jungen Gynäkologen die Weiterbildung in der Strahlentherapie und Psychoonkologie.

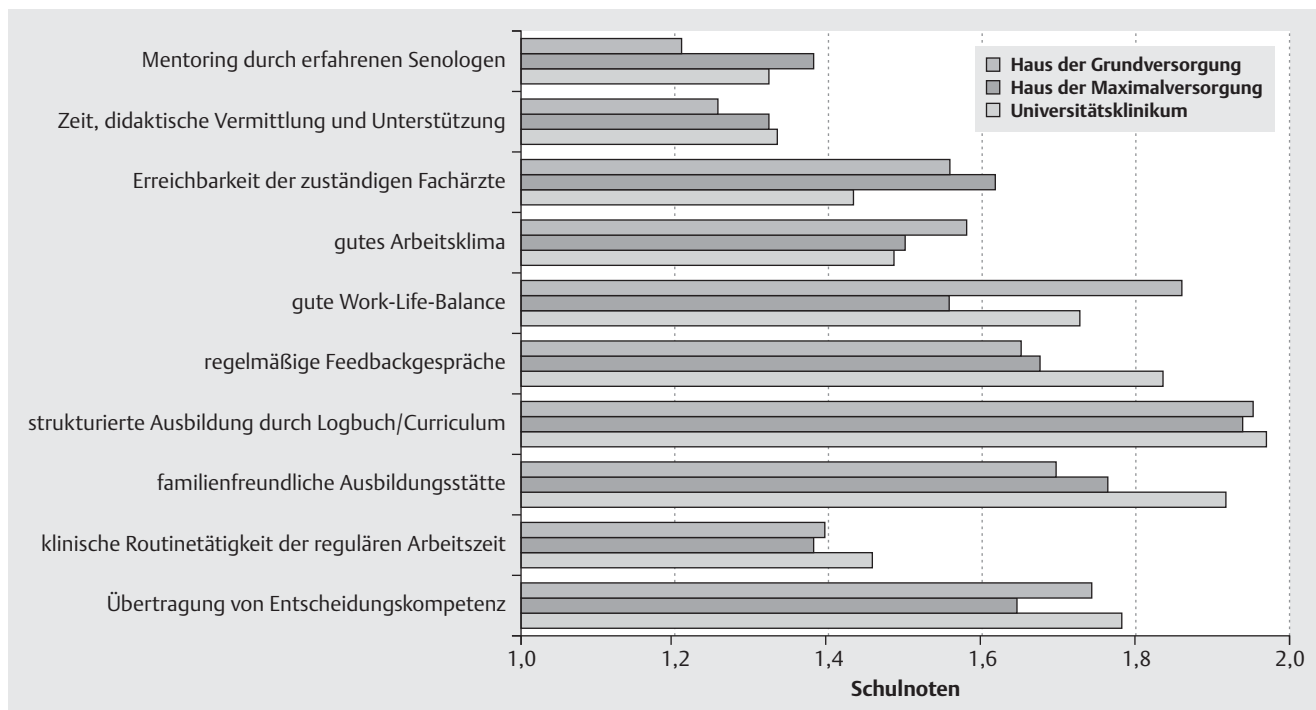

**Abb. 5** Was finden Sie bez. der Weiterbildungsqualität in der Senologie wichtig? Bewertungsskala: 1 = sehr wichtig bis 6 = überhaupt nicht wichtig, keine Bewertung > 2 (Schulnoten).

### Weiterbildungsinhalte: Wunsch nach fester Rotation ins Brustzentrum und regelmäßigen Fortbildungen

Die Notwendigkeit verschiedener Weiterbildungsinhalte wurde abgefragt, um potenzielle Verbesserungsmöglichkeiten zu erfassen (Abb. 4). Eine feste Rotation in ein Brustzentrum, eine umfassende Ausbildung in der Mammachirurgie und senologischen Diagnostik, sowie regelmäßige Fortbildungen waren allen Weiterbildungsassistenten von besonderer Bedeutung. Weiterhin sorgen sich die Befragten um die generell vorgeschriebene Erfüllung des Logbuchs für die Facharztanerkennung. Das Interesse der Befragten an Lehrtätigkeiten (Universitätsklinikum [2,34] vs. Haus der Grund- und Regelversorgung [3,59] oder Haus der Maximalversorgung [3,39]) und experimenteller Forschung (Universitätsklinikum [2,54] vs. Haus der Grund- und Regelversorgung [3,74] oder Haus der Maximalversorgung [4,00]) war besonders an Universitätsklinikum gegeben. Diese Unterschiede waren jeweils signifikant ( $p < 0,001$ ).

### Verbesserungsansätze in der Weiterbildungsqualität

Weiterhin wurde evaluiert, welche Faktoren für eine gute Weiterbildungsqualität relevant sind (Abb. 5). Die jungen Kollegen legten besonderen Wert auf ein umfassendes Mentoringssystem. Sehr wichtig war ausreichend Zeit für die Vermittlung von Inhalten durch die für die Weiterbildung verantwortlichen Personen. Alle Weiterbildungsassistenten waren daran interessiert, die klinischen Routinetätigkeiten in der regulären Arbeitszeit erledigen zu können. An allen Kliniken wurde eine strukturierte Weiterbildung gewünscht. Insgesamt ergaben sich keine signifikanten Unterschiede zwischen der Art der Ausbildungsstätte.

### Diskussion

Dies ist die erste deutschlandweite Befragung von Weiterbildungsassistenten in der Gynäkologie und Geburtshilfe zur Weiterbildung in der Senologie. In unserer Untersuchung konnten wir darstellen, dass die Senologie als integraler Bestandteil der Gynäkologie wahrgenommen wird. Die Ergebnisse zeigen, dass in der Senologie, wie in der Medizin und Gynäkologie generell, hauptsächlich weibliche Kollegen arbeiten [5,6]. Diese Zunahme der Ärztinnen wird in operativen Fächern langfristig zu Nachwuchsproblemen führen, da Frauen einer aktuellen Studie zufolge seltener eine chirurgische Karriere einschlagen und öfter eine Teilzeitstelle ergreifen, wodurch der Bedarf an Ärzten zunehmen wird [7]. Aufgrund der hohen Anzahl ambulanter Patienten und elektiven Operationen bietet die Senologie durchaus planbare und geregelten Arbeitszeiten und somit eine besondere Chance für in Teilzeit arbeitende Kollegen.

Darüber hinaus konnte die Umfrage erstmals zeigen, dass unter den Weiterbildungsassistenten ein ausgeprägtes Interesse an dem Fachbereich Senologie existiert. Es besteht dementsprechend die Möglichkeit, den Nachwuchs durch eine gute Weiterbildung für diesen Bereich zu gewinnen und die Senologie nachhaltig zu stärken.

Insgesamt wird die aktuell praktizierte Weiterbildungsqualität zufriedenstellend bewertet, es besteht allerdings noch Verbesserungspotenzial. Dies geht einher mit den Ergebnissen der Evaluation der Bundesärztekammer zur Weiterbildung. Bei den Erhebungen aus 2011 wurde in der Globalbeurteilung für alle Fachrichtungen ein Notendurchschnitt von 2,54 erzielt, und die gynäkologische Weiterbildung wurde von den Weiterbildungsassistenten mit 2,60 im Vergleich zum Bundesdurchschnitt etwas schlechter bewertet [8,9].

Speziell die wissenschaftliche Ausbildung sowie angrenzende Fachbereiche wie die Pathologie und Strahlentherapie und auch die Psychoonkologie erscheinen in unserer Erhebung als Weiterbildungsinhalte unterrepräsentiert. Das Bündnis JUNGE ÄRZTE fordert hierzu eine strukturierte Integration von Forschungsinhalten in die Facharztweiterbildung, um den wissenschaftlichen Nachwuchsmangel abzuwenden [10]. Dies gilt auch für die Senologie. Ein Förderprogramm könnte dabei hilfreich sein, interessierte Assistenten in die Senologie einzuarbeiten und wissenschaftlich zu begleiten, ein Curriculum für die senologische Weiterbildung zu strukturieren und den Abteilungen zu empfehlen. Der Effekt eines strukturierten, evidenzbasierten Curriculums für die Brustchirurgie-Rotation wurde bereits in einer prospektiven Studie aus Phoenix, USA getestet, und konnte eine signifikante Zufriedenheitssteigerung sowie Wissenszuwachs unter den Teilnehmern nachweisen [11]. Der Einfluss der Assistenz bei Brustoperationen auf die Tumorfreiheit der Schnittränder wurde von Plichta et al. untersucht [12]. Hier konnte gezeigt werden, dass eine kontinuierliche Lernkurve unter Weiterbildungsassistenten innerhalb der Brustchirurgie-Rotation die Rate von positiven Schnitträndern reduzieren kann. Eine weitere aktuelle Studie unter amerikanischen Weiterbildungsassistenten der Chirurgie konnte belegen, dass 72% aller essenziellen Brustoperationstechniken in den ersten 3 Weiterbildungsjahren durchgeführt werden können [13]. Auch wenn diese Daten nur einschränkt auf das deutsche System übertragen werden können, lassen diese Studien erkennen, dass schon in einem frühen Weiterbildungsabschnitt das Spektrum der Senologie vermittelt werden kann und junge Kollegen durch ein intensiviertes Trainingsprogramm weiter gefördert werden können. Wie sich auch unserer Umfrage entnehmen lässt, sollte die senologische Weiterbildung idealerweise innerhalb einer festen Brustzentrumsrotation stattfinden. Ziel könnte sein, Interessierte bei ihrer beruflichen Entwicklung frühzeitig zu begleiten und langfristige Berufsperspektiven zu entwickeln.

Es konnte aufgezeigt werden, dass die senologische Weiterbildung in den Universitätskliniken in nahezu allen Inhaltsebenen am besten bewertet wurde. Das könnte an der interdisziplinären und akademischen Ausrichtung der Universitätskliniken liegen, die, im Gegensatz zu anderen ausgewerteten Arbeitsstätten, immer alle Bereiche der Senologie vorhalten. Ferner sind die meisten der zertifizierten Brustzentren den Universitätskliniken angegliedert und verfügen gewöhnlich über eine größere Teamstärke [4]. Aufgrund dieser Zertifizierung müssen wichtige Weiterbildungsinhalte wie onkologische Ambulanzen, psychoonkologische Einrichtungen und ein Institut für Pathologie vorhanden sein. Hierdurch ist die Interaktion mit kooperierenden Fachdisziplinen gewährleistet und eine Bedingung der Zertifizierung. Dies kommt sicherlich auch der Weiterbildung zugute. Auch die Teilnahme an Tumorboards ist verpflichtend, was an kleineren Kliniken oft nicht realisiert werden kann und bemängelt wurde. Eine weitere wichtige Anmerkung war die unzureichende Möglichkeit besonders an Häusern der Grund- und Regelversorgung senologische Patienten betreuen zu können. Ein möglicher Lösungsansatz wäre hier ein Rotationsprogramm von Weiterbildungsassistenten in andere Kliniken, um unzureichend zugängliche Bereiche abzudecken. Sicherlich gibt es generell große Unterschiede zwischen den einzelnen Kliniken, sowohl den Universitätskliniken wie auch den Häusern der Grund- und Regelversorgung, sodass die Ergebnisse dieser Umfrage nicht voreilig pauschalisiert werden sollten. Eine Einzelbewertung der Kliniken erfolgte mit diesem Fragenbogen nicht.

Durch die zielgerichtete Einladung über den Newsletter des Jungen Forums der DGGG konnten wir die Zielgruppe der Weiterbildungsassistenten direkt ansprechen und eine homogene Studienpopulation erreichen. Aufgrund der Online-Umfrage konnte Anonymität gewährleistet werden. Ein Nachteil des Online-Verfahrens generell stellt die mangelnde Repräsentativität dar, da z. B. durch Computerprobleme Verzerrungen entstehen. Weiterhin konnten keine Interviewabbrücker registriert werden, was vermutlich an dem kurzen Fragebogen lag. Die Schwäche dieser Studie liegt in der geringen Partizipationsrate von 2,8%. Man kann annehmen, dass ein positiver und negativer Selektionsbias innerhalb der Studienpopulation vorliegt – einerseits motivierte und andererseits frustrierte Weiterbildungsassistenten. Die Masse wird nicht erreicht, was an einem mangelnden Interesse der jungen Kollegen an der politischen Mitbestimmung liegen könnte und auch in anderen Umfragen bestätigt wurde [14]. Dies ist bedauerlich, da mit der Umfrage ein Instrument zur Verfügung steht, sich aktiv an der Verbesserung der Weiterbildungsstruktur zu beteiligen.

## Zusammenfassung

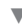

Insgesamt handelt es sich hier um die erste Bestandsaufnahme zur aktuellen Weiterbildungsqualität der Senologie in Deutschland. Die Ergebnisse konnten zeigen, dass es großen potenziellen Nachwuchs gibt. Des Weiteren variiert die empfundene Weiterbildungsqualität stark zwischen den Weiterbildungsstätten. Die hier gewonnenen Erfahrungen könnten dementsprechend als Grundlage und Anstoß zur Verbesserung der flächendeckenden Weiterbildung in der Senologie dienen, um den Fachbereich für zukünftige Senologen attraktiver zu gestalten.

Weitere Information unter: <http://www.dggg.de/junges-forum/>

## Fazit für die Praxis

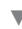

- ▶ Es gibt großen potenziellen Nachwuchs für eine senologische Weiterbildung.
- ▶ Die empfundene Weiterbildungsqualität variiert stark zwischen den Weiterbildungsstätten.
- ▶ Die gewonnenen Erfahrungen könnten als Grundlage und Anstoß zur Verbesserung der flächendeckenden Weiterbildung in der Senologie dienen.

## Danksagungen

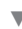

Wir möchten uns bei allen Mitgliedern des Arbeitskreises des Jungen Forums für die fruchtbaren Diskussionen bei der Erstellung des Fragebogens bedanken sowie bei der DGGG für das Bekanntmachen der Umfrage über den Newsletter. Des Weiteren bedanken wir uns bei allen Teilnehmern dieser Umfrage.

## Interessenkonflikt

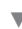

Nein.

## Institute

- <sup>1</sup> Uniklinik Köln – Klinik und Poliklinik für Frauenheilkunde und Geburtshilfe, Köln
- <sup>2</sup> Universitätsfrauenklinik und Poliklinik am Klinikum Südstadt Rostock, Rostock
- <sup>3</sup> Universitätsklinikum Erlangen – Frauenklinik, Erlangen
- <sup>4</sup> Vinzenzkrankenhaus Hannover – Frauenklinik, Hannover
- <sup>5</sup> Vivantes Klinikum Neukölln – Frauenklinik, Berlin
- <sup>6</sup> Universitäts-Frauenklinik Heidelberg, Heidelberg

## Literatur

- 1 Dieterich M, Dieterich H, Nestle-Krämling C et al. [Certification of breast surgeons in Germany-AWO-gyn curriculum in an International comparison]. *Geburtsh Frauenheilk* 2009; 11: 987–992
- 2 Wallwiener D. Strategien, Erfolge, Visionen – Bericht des Präsidenten der Deutschen Gesellschaft für Senologie. *Senologie* 2011; 8: 44–57
- 3 Online: <http://www.senologie.org/deutsche-akademie-fuer-senologie>; Stand: 02.05.2016
- 4 Brucker SY, Simoes E, Wallwiener D et al. Zertifizierung von Brustzentren. Was haben wir erreicht? *Gynäkologische Praxis* 2014; 38: 329
- 5 Bitzinger D, Heberlein A, Theilmeier G. Forschung in der Weiterbildung: Die Generation Y will klare Ansagen über Karrierewege. *Dtsch Arztebl* 2014; 111: A-442/B-384/C-368
- 6 Hibbeler B, Korzilius H. Arztberuf: Die Medizin wird weiblich. *Dtsch Arztebl* 2008; 105: A-609/B-539/C-527
- 7 Riepen T, Mobus V, Kullmer U et al. Male and female physicians in hospital gynaecology departments – analysis of the impact of “feminisation” from the viewpoint of medical directors. *Geburtsh Frauenheilk* 2013; 73: 53–58
- 8 Korzilius H. Evaluation der Weiterbildung: Im Ergebnis eine gute Zweiminus. *Dtsch Arztebl* 2011; 108: A-2694/B-2250/C-2222
- 9 Online: <http://www.evaluation-weiterbildung.de/ergebnisse.html>; Stand: 02.05.2016
- 10 Online: <https://jungeaerzte.wordpress.com/pressemitteilungen-veroeffentlichungen/>; Stand: 02.05.2016
- 11 Komenaka IK, Heberer MA, O'Neill PJ et al. The effect of an evidence-based medicine curriculum on breast cancer knowledge and satisfaction of surgical residents. *J Surg Educ* 2015; 72: 717–725
- 12 Plichta JK, Perez CB, He E et al. Does practice make perfect? Resident experience with breast surgery influences excision adequacy. *Am J Surg* 2015; 209: 547–551
- 13 Conway RG, Bartlett EK, Hoffman RL et al. Residents' experience in breast cancer care. *J Surg Educ* 2015; 72: 1233–1239
- 14 Knieper C, Ramsauer B, Hancke K et al. “Pregnant and operating”: evaluation of a Germany-wide survey among female gynaecologists and surgeons. *Geburtsh Frauenheilk* 2014; 74: 875–880
